# Supplementary material for: Modeling key pathological features of frontotemporal dementia with C9ORF72 repeat expansion in iPSC-derived human neurons
Source: Springer Nature journal article supplement (doi:10.1007/s00401-013-1149-y), 2013-07-08

Almeida et al., Figure S6

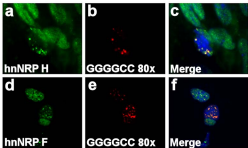

Supplement: MOESM6 [file 8404254]
